# Supplementary material for: Assessing Alternative Scenarios for the Cause of Underpressures in the Ordovician Sediments along the Eastern Flank of the Michigan Basin
Source: Hindawi journal article supplement (doi:10.1155/2017/8647917), 2017-01-01
Supplement: f1 [file 8647917.f1.pdf]

# Assessing Alternative Scenarios for the Cause of Underpressures in the Ordovician Sediments along the Eastern Flank of the Michigan Basin

Stefano D. Normani\*<sup>1</sup>, Jonathan F. Sykes<sup>†1</sup>, Mark R. Jensen<sup>‡2</sup>, and Eric A. Sykes<sup>§2</sup>

<sup>1</sup>Department of Civil and Environmental Engineering, University of Waterloo, Waterloo, Ontario, Canada, N2L 3G1

<sup>2</sup>Nuclear Waste Management Organization, 22 St. Clair Avenue East, 6th Floor, Toronto, Ontario, Canada, M4T 2S3

## Supplemental Information

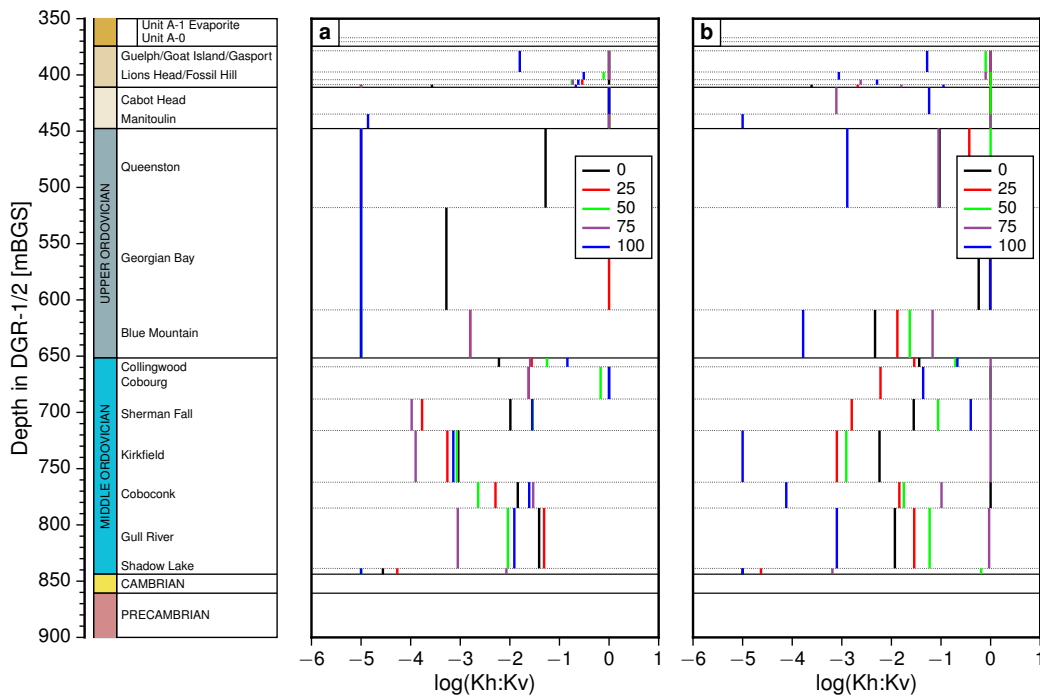

Figure S1: Calibrated horizontal:vertical hydraulic conductivity anisotropy ratios using glaciation scenario nn9921. Coloured lines represent different percentages of ice-sheet thickness applied as excess head to the top boundary condition. Subfigure (a) uses present day environmental heads as the initial condition while subfigure (b) uses a hydrostatic head condition computed assuming steady-state.

\*Corresponding Author: sdnorman@uwaterloo.ca

<sup>†</sup>sykesj@uwaterloo.ca

<sup>‡</sup>mjensen@nwmo.ca

<sup>§</sup>esykes@nwmo.ca

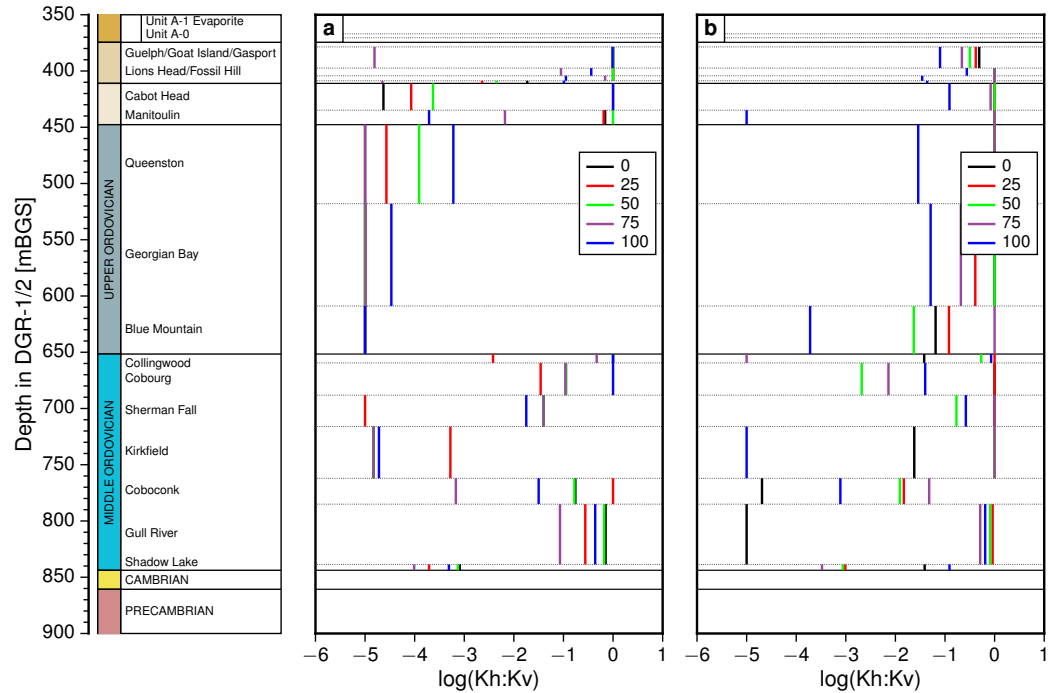

Figure S2: Calibrated horizontal:vertical hydraulic conductivity anisotropy ratios using glaciation scenario nn9930. Coloured lines represent different percentages of ice-sheet thickness applied as excess head to the top boundary condition. Subfigure (a) uses present day environmental heads as the initial condition while subfigure (b) uses a hydrostatic head condition computed assuming steady-state.

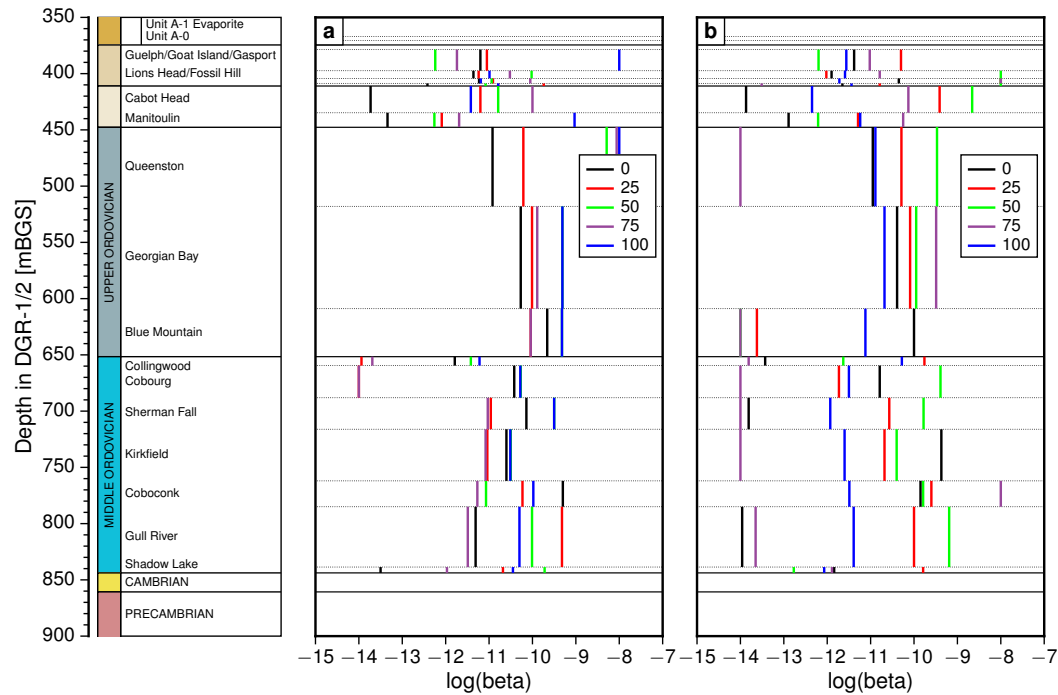

Figure S3: Calibrated vertical compressibility using glaciation scenario nn9921. Coloured lines represent different percentages of ice-sheet thickness applied as excess head to the top boundary condition. Subfigure (a) uses present day environmental heads as the initial condition while subfigure (b) uses a hydrostatic head condition computed assuming steady-state.

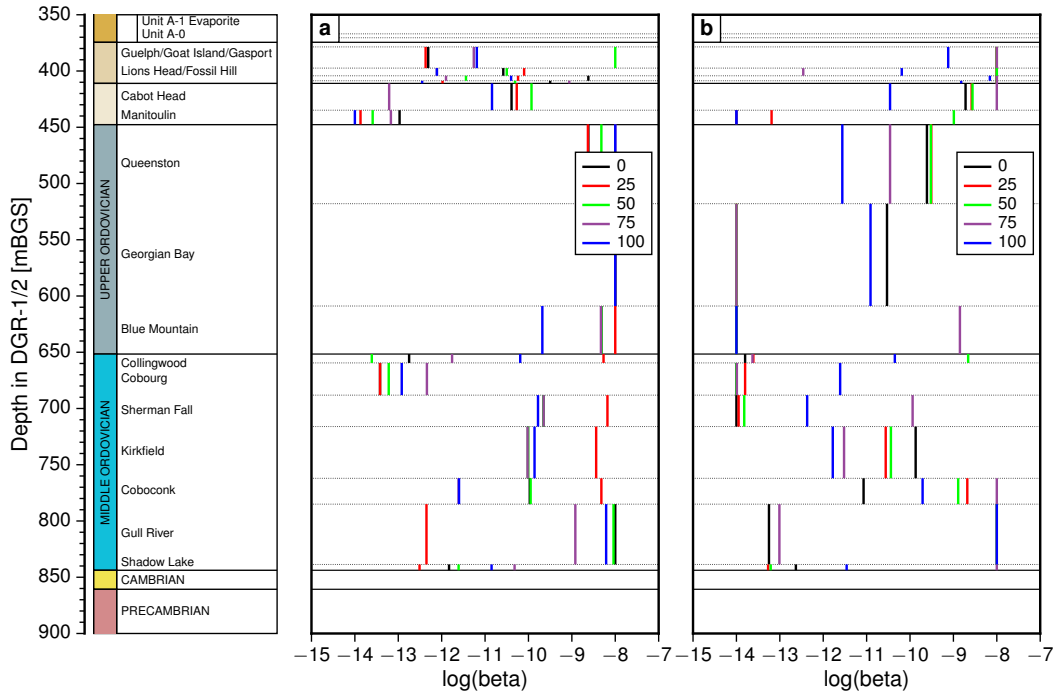

Figure S4: Calibrated vertical compressibility using glaciation scenario nn9930. Coloured lines represent different percentages of ice-sheet thickness applied as excess head to the top boundary condition. Subfigure (a) uses present day environmental heads as the initial condition while subfigure (b) uses a hydrostatic head condition computed assuming steady-state.

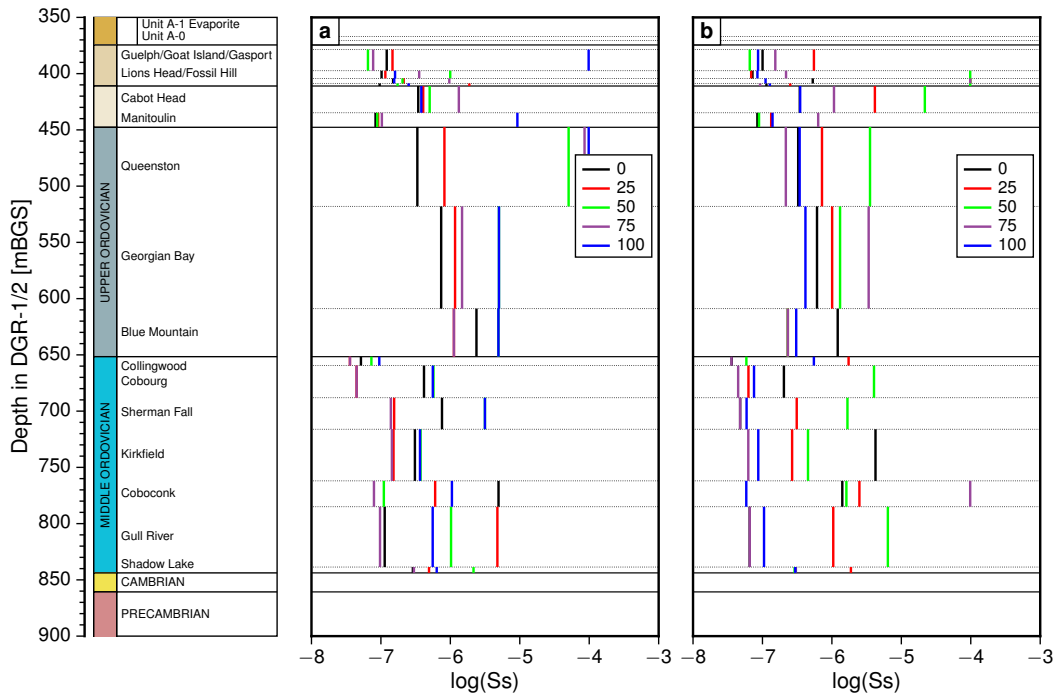

Figure S5: Calibrated specific storage using glaciation scenario nn9921. Coloured lines represent different percentages of ice-sheet thickness applied as excess head to the top boundary condition. Subfigure (a) uses present day environmental heads as the initial condition while subfigure (b) uses a hydrostatic head condition computed assuming steady-state.

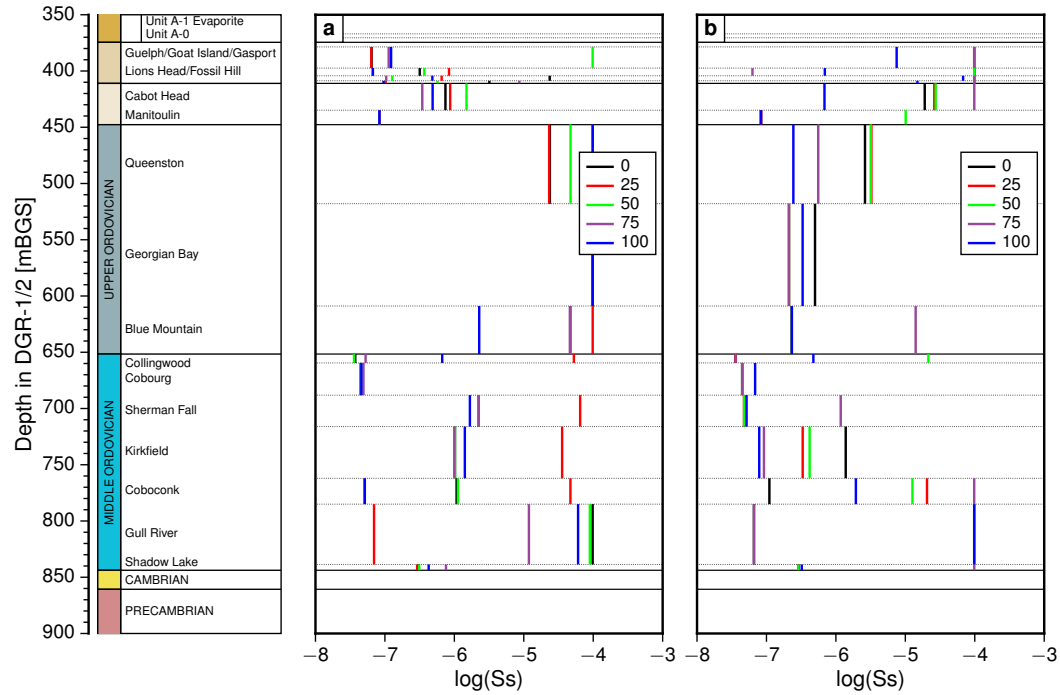

Figure S6: Calibrated specific storage using glaciation scenario nn9930. Coloured lines represent different percentages of ice-sheet thickness applied as excess head to the top boundary condition. Subfigure (a) uses present day environmental heads as the initial condition while subfigure (b) uses a hydrostatic head condition computed assuming steady-state.

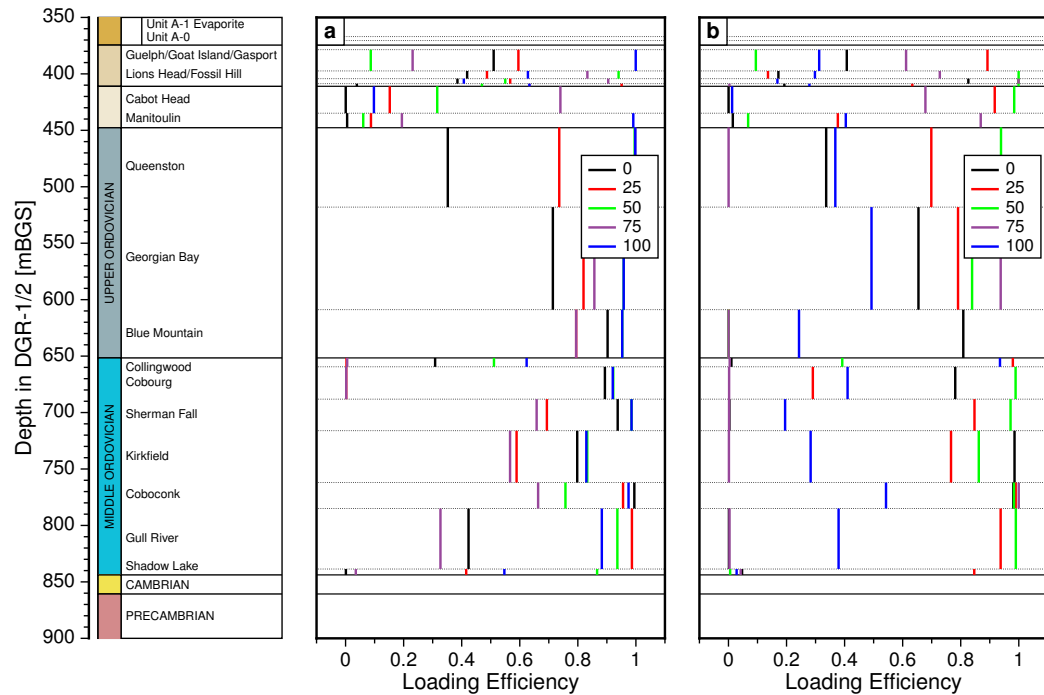

Figure S7: Calibrated loading efficiency using glaciation scenario nn9921. Coloured lines represent different percentages of ice-sheet thickness applied as excess head to the top boundary condition. Subfigure (a) uses present day environmental heads as the initial condition while subfigure (b) uses a hydrostatic head condition computed assuming steady-state.

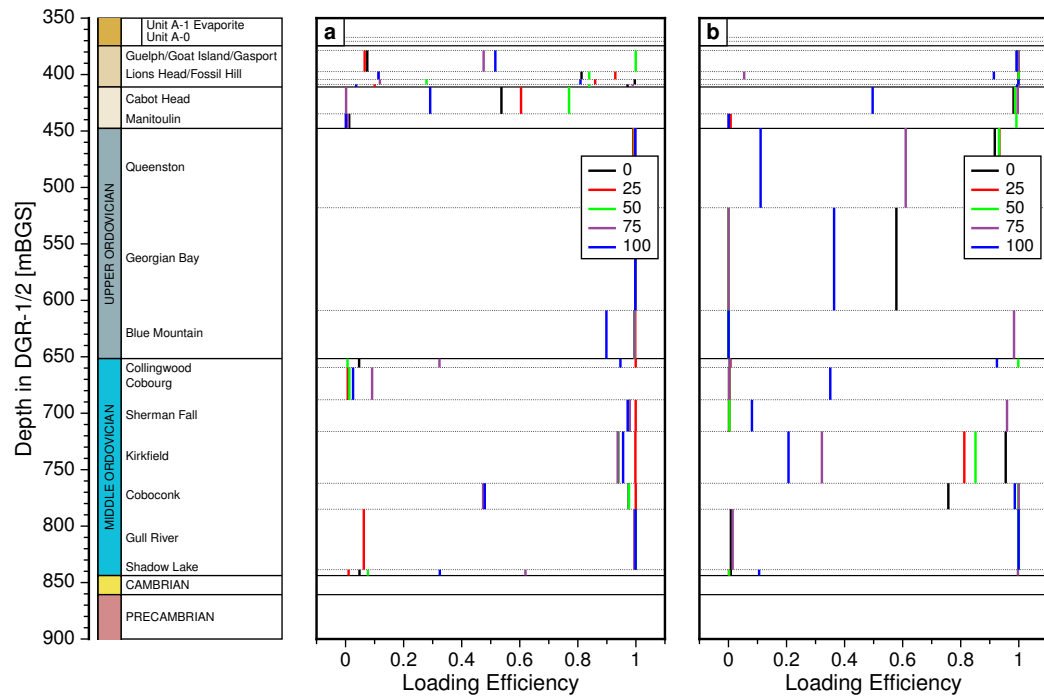

Figure S8: Calibrated loading efficiency using glaciation scenario nn9930. Coloured lines represent different percentages of ice-sheet thickness applied as excess head to the top boundary condition. Subfigure (a) uses present day environmental heads as the initial condition while subfigure (b) uses a hydrostatic head condition computed assuming steady-state.
